# Supplementary material for: Toward high practical capacitance of Ni(OH)2 using highly conductive CoB nanochain supports
Source: Royal Society of Chemistry journal article supplement (doi:10.1039/c6ta08796e), 2016-11-23
Supplement: c6ta08796e1.pdf [file c6ta08796e1.pdf]

## Supporting Information

# Toward High Practical Capacitance of Ni(OH)<sub>2</sub> Using Highly Conductive CoB Nanochain Supports

Hui Wang,<sup>a,+</sup> Jingjing Yan,<sup>a,+</sup> Rongfang Wang,<sup>\*a</sup> Shunxi Li,<sup>a</sup> Dan J.L Brett,<sup>b</sup> Julian Key,<sup>c</sup> and  
Shan Ji<sup>\*a,b</sup>

<sup>a</sup> College of Chemistry and Chemical Engineering, Northwest Normal University, Lanzhou, 730070, China, \*E-mail: wangrf@nwnu.edu.cn

<sup>b</sup> EIL, Dept. Chemical Engineering, University College London, London WC1E 7JE, UK, \*E-mail: shan.ji@ucl.ac.uk

<sup>c</sup> Collaborative Innovation Center of Renewable Energy Materials (CICREM), Guangxi University Guangxi Univerisity, Nanning, 530004, China.

+Equal contributors

## Experimental

### Material synthesis:

All reagents were of analytic grade, and double-distilled water was used throughout the experiments. To prepare the linear structured CoB sample, 0.35 mmol CoCl<sub>2</sub>•6H<sub>2</sub>O and 0.7 mmol NaOH were dissolved into 35 mL deionized water with intense stirring. Then 35 mL of 0.02 mol L<sup>-1</sup>NaBH<sub>4</sub> solution was added drop-wise to the above solution with the fixed magnetic field intensity of ca. 0.4 Tesla under the vessel. The as-prepared CoB was rinsed with double-distilled water and ethanol alternately, and finally dried in vacuum oven at 40 °C for 8 h.

To prepare CoB@Ni(OH)<sub>2</sub>, 20 mg of the as-prepared CoB was added to 20 mL deionized water, after which 0.1 mmol NiCl<sub>2</sub>•6H<sub>2</sub>O was dissolved into the suspension. The suspension was stirred at a rotation rate of 500 rpm for 1 h, wherein the following reactions occur:

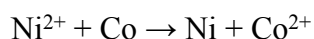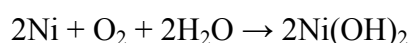

The product was rinsed with double-distilled water and ethanol alternately, and finally dried in vacuum oven at 40 °C for 8 h.

## **Characterization**

XRD patterns were recorded on a Shimadzu XD-3A (Japan) using filtered Cu-K $\alpha$  radiation ( $\lambda = 0.15418$  nm) generated at 40 kV and 30 mA. Scans for  $2\theta$  values were recorded at 4° min<sup>-1</sup>. Scanning electron microscopy (SEM) images were obtained using a Carl Zeiss Ultra Plus electron microscope. Transmission electron microscopy (TEM) high angle annular dark field scanning transmission electron microscopy (STEM) images of the catalysts were obtained using a JEOL (JEM-2000 FX) microscope operating at 200 kV. Specific surface area was determined by the Brunauer-Emmett-Teller (BET) method, and the density functional theory DFT method was employed for analyzing the full range of pore size distribution based on the sorption isotherms obtained on a Quantachrome Autosorb-1 volumetric analyzer. X-Ray Photoelectron Spectroscopy (XPS) spectra were generated using Thermo Scientific Escalab 250Xi. Binding energies were determined by referencing to the C 1 s peak at 285.0 eV. The molar ratios of Co, B Ni, in the bulk samples were determined by a Varian 720 Inductively Coupled Plasma-Optical Emission Spectrometer (ICP-OES).

## **Electrochemical measurements**

Cyclic voltammograms (CV) and galvanostatic charge/discharge tests on CoB@Ni(OH)<sub>2</sub> were carried out in a three-electrode cell. The working electrode comprised 1 cm<sup>2</sup> of a film containing CoB@Ni(OH)<sub>2</sub>, carbon black and poly(tetrafluoroethylene) with a mass ratio of 80:10:10, pressed into the Ni foam current collectors. An Hg/HgO (1.0 M KOH) reference electrode and an activated carbon counter electrode was used in all experiments in 6 mol L<sup>-1</sup> KOH electrolyte. CV tests were done on a CHI 650D electrochemical workstation.

Galvanostatic charge/discharge tests were carried out on a Neware Battery Tester (BTS6.0, Neware Technology Company, Guangdong, China).

The capacitance of the electrode ( $C$ ) was calculated according to the following equation based on CVs or the discharge curves.

$$C = \frac{Q}{V} = \frac{i\Delta t}{\Delta V m} \quad (1)$$

where  $i$  is the sampled current,  $\Delta t$  is a sampling time span,  $\Delta V$  is the total potential deviation of the voltage window, and  $m$  is the mass of the active material examined.

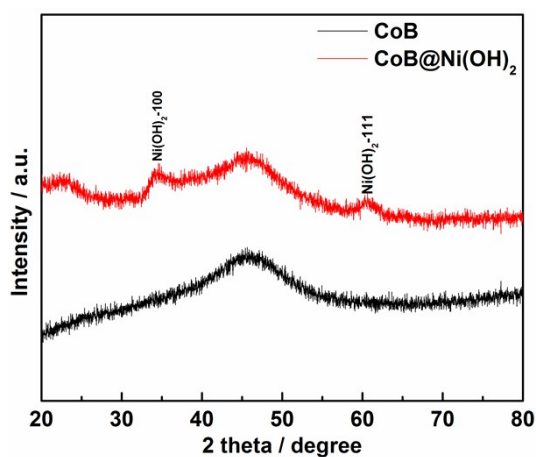

Fig. S1 XRD patterns of CoB and CoB@Ni(OH)<sub>2</sub>.

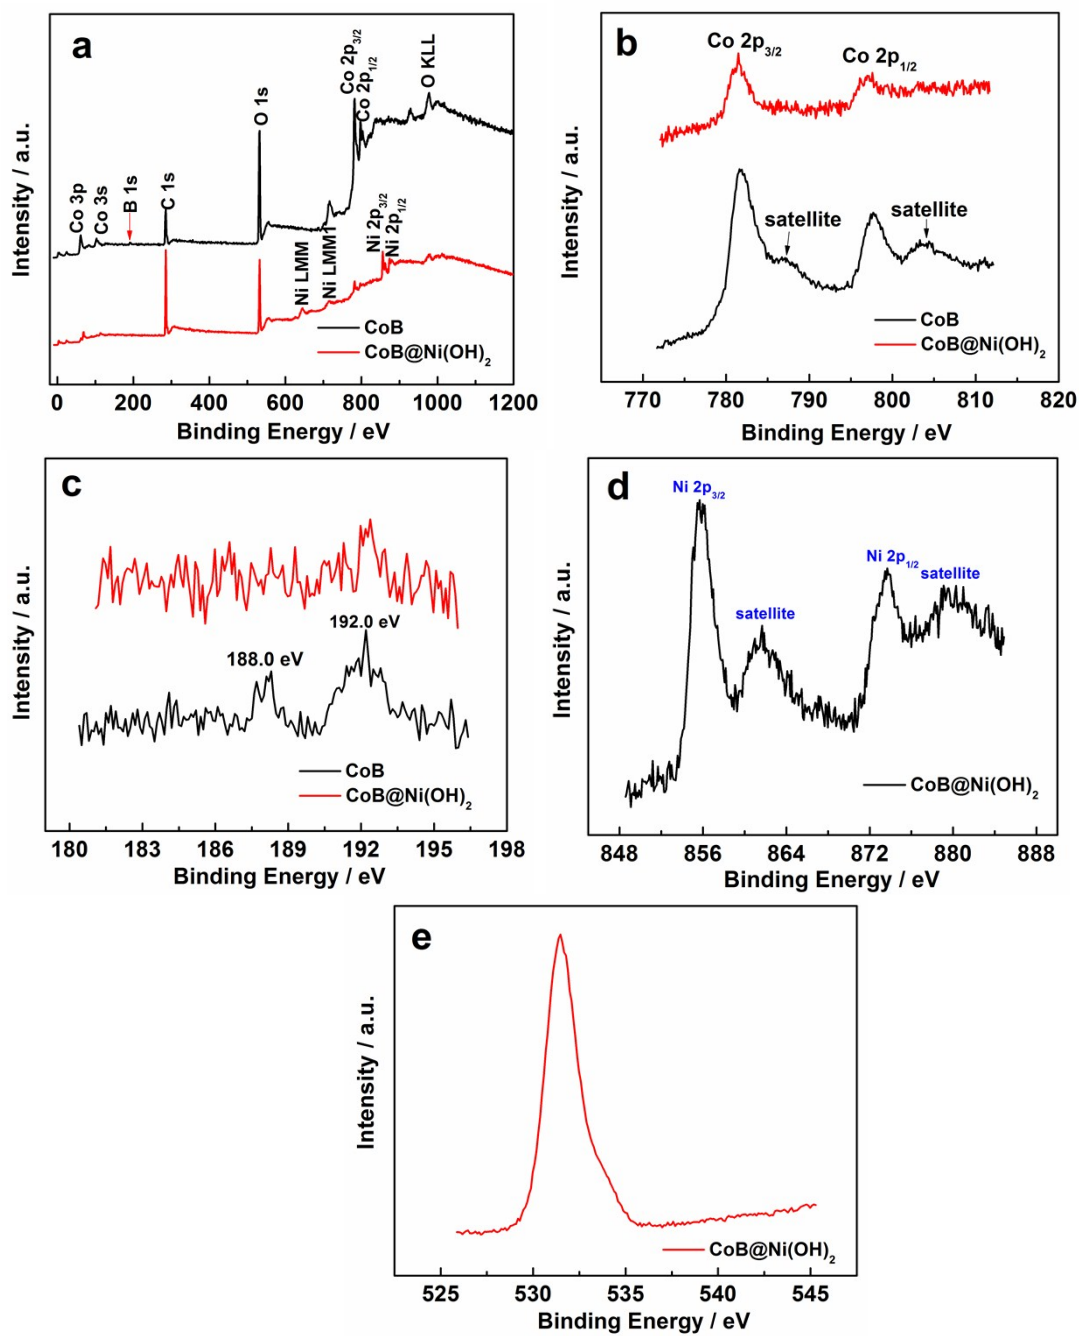

**Fig. S2** (a) Overall XPS surveys of CoB and CoB@Ni(OH)<sub>2</sub>; (b) Co 2p; (c) B 1s XPS of CoB and CoB@Ni(OH)<sub>2</sub>; (d) Ni 2p; and (e) O 1s XPS of CoB@Ni(OH)<sub>2</sub>.

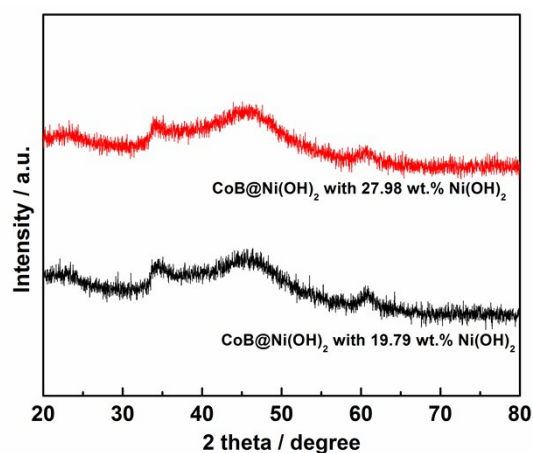

**Fig. S3** XRD pattern of CoB@Ni(OH)<sub>2</sub> with 19.79 wt.% and 27.98 wt.% Ni(OH)<sub>2</sub>.

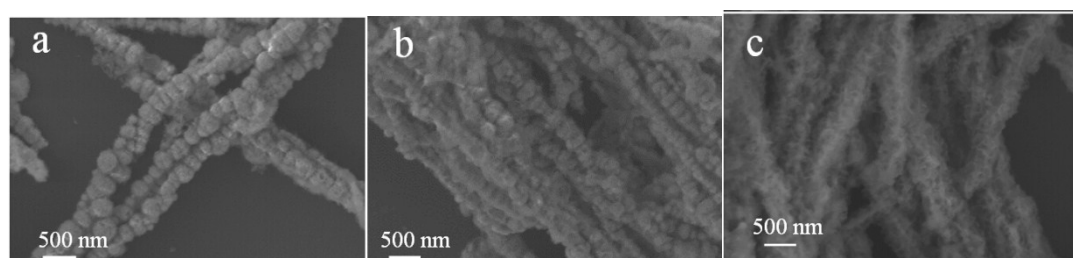

**Fig. S4** SEM images of CoB@Ni(OH)<sub>2</sub> with the different masses of Ni(OH)<sub>2</sub>; (a): 12.26 wt.%, (b): 19.79 wt.%, (c): 27.98 wt.%.

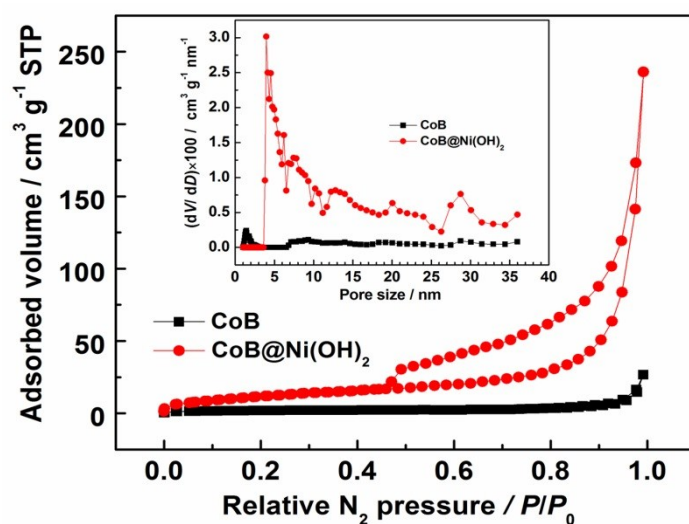

**Fig. S5** N<sub>2</sub> isotherms and the pore size distribution (Inset) of CoB and CoB@Ni(OH)<sub>2</sub>.

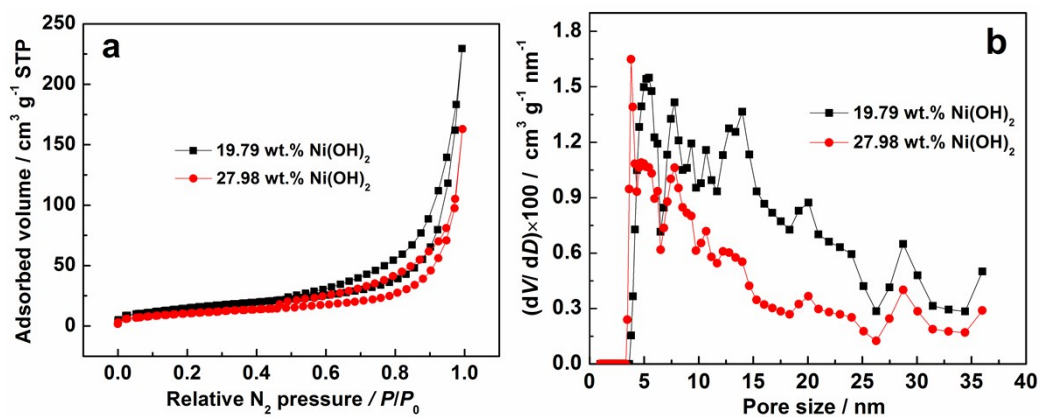

**Fig. S6** (a)  $N_2$  isotherms; (b) corresponding pore size distribution of CoB and CoB@Ni(OH)<sub>2</sub> with 19.79 wt.% Ni(OH)<sub>2</sub> (black line) and 27.98 wt.% Ni(OH)<sub>2</sub> (red line).

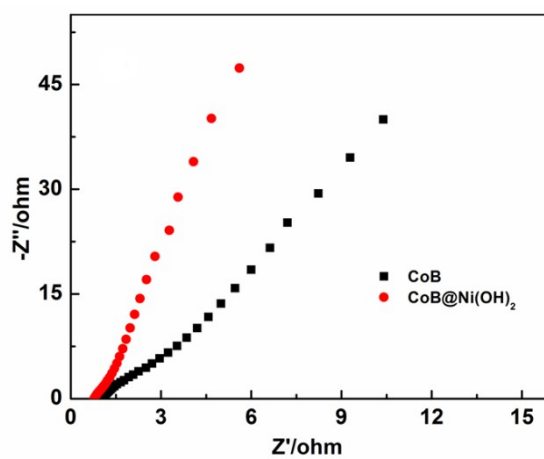

**Fig. S7** Comparison of Nyquist plots of the CoB and CoB@Ni(OH)<sub>2</sub> (27.98 wt.%) electrodes

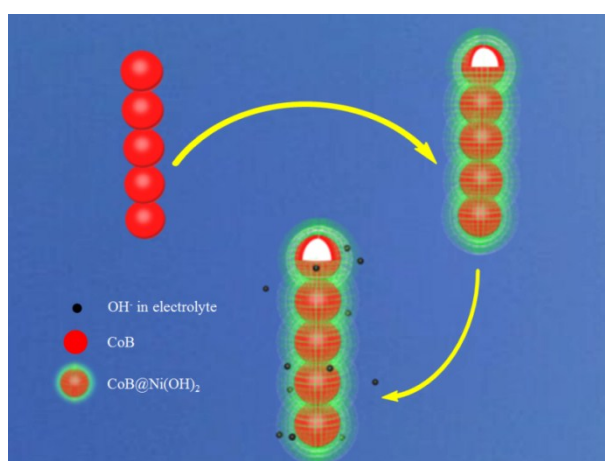

**Fig. S8** Schematic of the CoB@Ni(OH)<sub>2</sub> hybrid, showing CoB core and Ni(OH)<sub>2</sub>.

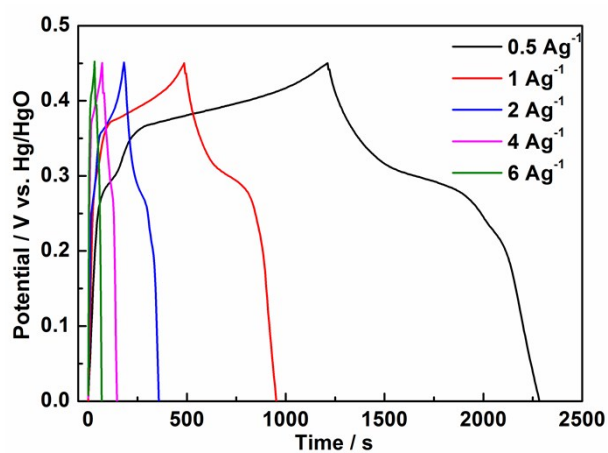

**Fig. S9** Galvanostatic charge-discharge curves of CoB at different current densities (0.5, 1, 2, 4, and 6 A g<sup>-1</sup>).

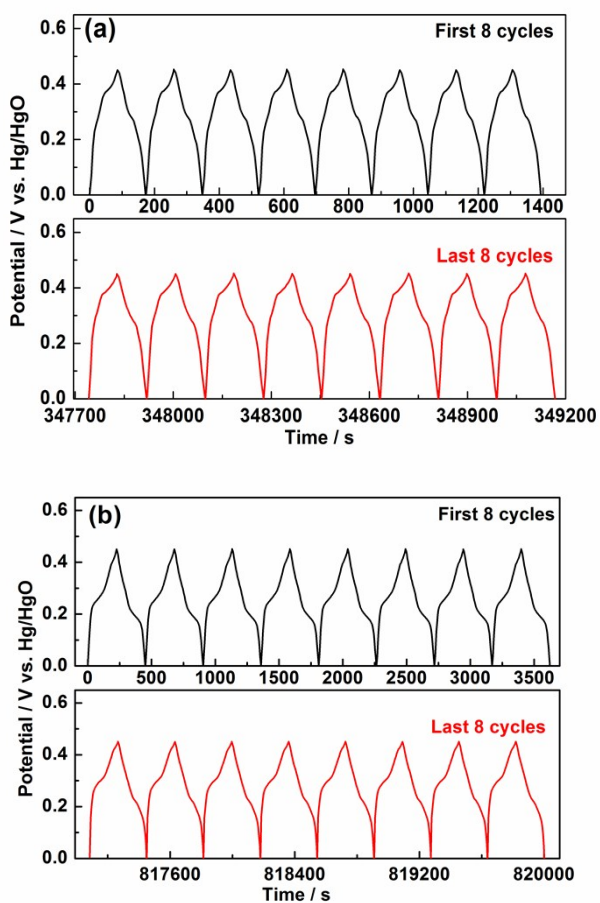

**Fig. S10** Charge-discharge curves comparison of the first and last 8 cycles of (a) CoB; and (b) CoB@Ni(OH)<sub>2</sub>; current density: 2 A g<sup>-1</sup>; electrolyte: 6 mol L<sup>-1</sup> KOH.

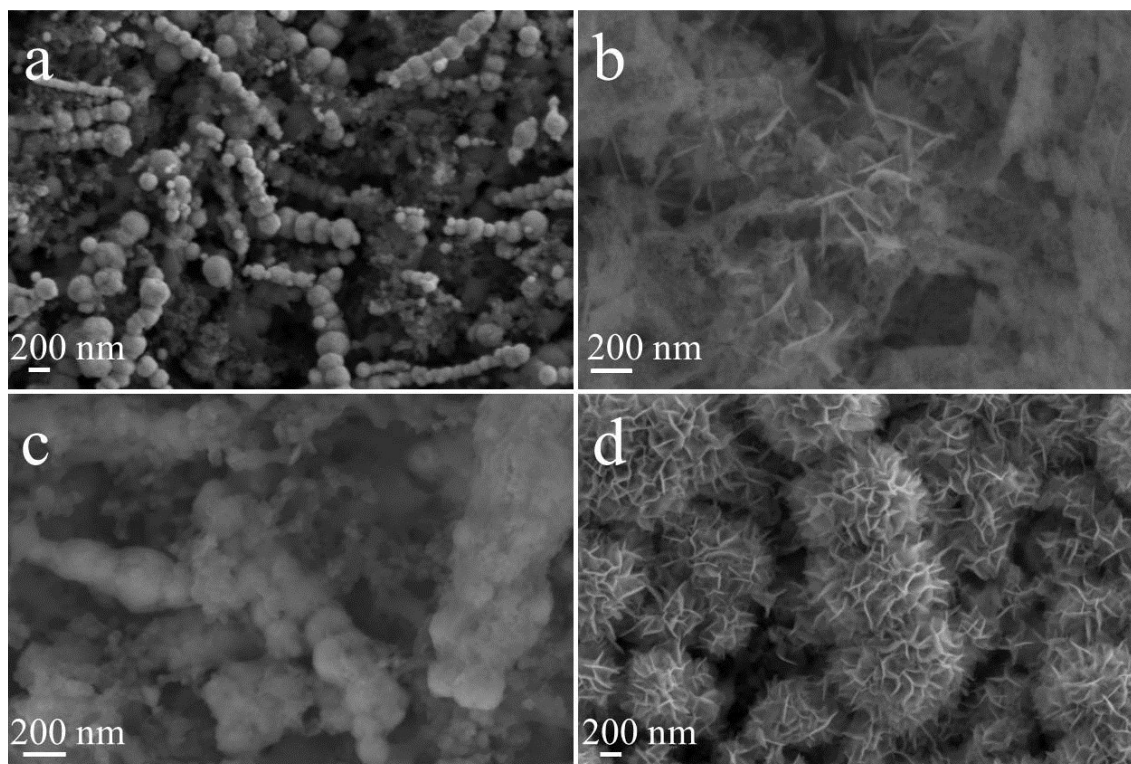

**Fig. S11** SEM images of  $\text{CoB@Ni(OH)}_2$  before (a,b) and after (c,d) 2500 continuous charge-discharge cycles at a current density of  $2 \text{ A g}^{-1}$ .

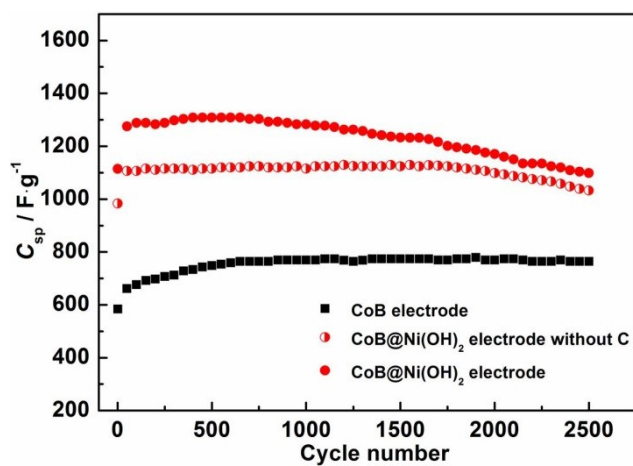

**Fig. S12** Cycling tests of the CoB,  $\text{CoB@Ni(OH)}_2$  and  $\text{CoB@Ni(OH)}_2$  without carbon electrodes for 2500 cycles at a current density of  $2 \text{ A g}^{-1}$ .



**Table S1.** Bulk composition of the as-prepared CoB and a series of CoB@Ni(OH)<sub>2</sub> samples.

| Sample                  | Moles of NiCl <sub>2</sub> precursor (mmol) | Atomic ratio of Co:B:Ni | Mass percentage of Ni(OH) <sub>2</sub> |
|-------------------------|---------------------------------------------|-------------------------|----------------------------------------|
| CoB                     | ---                                         | 2.2:1                   | ---                                    |
| CoB@Ni(OH) <sub>2</sub> | 0.1                                         | 10.43:4.74:1            | 12.26 wt.%                             |
| CoB@Ni(OH) <sub>2</sub> | 0.14                                        | 5.89:2.68:1             | 19.79 wt.%                             |
| CoB@Ni(OH) <sub>2</sub> | 0.2                                         | 3.74:1.70:1             | 27.98 wt.%                             |
| CoB@Ni(OH) <sub>2</sub> | 0.26                                        | 3.88:1.85:1             | 27.28 wt.%                             |

The bulk elemental compositions of CoB and CoB@Ni(OH)<sub>2</sub> samples determined by ICP are listed in Table S1. The mass percentage of Ni(OH)<sub>2</sub> in CoB@Ni(OH)<sub>2</sub> increased with the increase of the mole of the NiCl<sub>2</sub> precursor, and reaches the maximum value of 27.98 wt.% at 0.2 moles of NiCl<sub>2</sub>. Further increase of NiCl<sub>2</sub> reduced the Ni(OH)<sub>2</sub> loading content. As described above (see Material Synthesis), the formation of Ni(OH)<sub>2</sub> is two-stage, beginning with formation of metallic Co atoms. With the increase of Ni(OH)<sub>2</sub> loading, the thickness of the shell covers the available Co atoms thus preventing further reduction of Ni<sup>2+</sup> to Ni metal.

**Table S2.** Comparison of CoB-core@Ni(OH)<sub>2</sub>-shell with other core-Ni(OH)<sub>2</sub>-shells reported in the literature .

| Sample core-shell                                                                   | Ref.     | Specific capacitance (F g <sup>-1</sup> ) | Areal capacitance (F cm <sup>-2</sup> ) | <sup>a</sup> Current density       | <sup>b</sup> Retention(%) / <sup>c</sup> cycling number / <sup>c</sup> current density | Electrolyte |
|-------------------------------------------------------------------------------------|----------|-------------------------------------------|-----------------------------------------|------------------------------------|----------------------------------------------------------------------------------------|-------------|
| Chain-like CoB@Ni(OH) <sub>2</sub> nanosheets                                       | Our work | 1293.7                                    | 7.76                                    | 2 A g <sup>-1</sup>                | 85%/2500/2 A g <sup>-1</sup>                                                           | 6 M KOH     |
| TiN nanowire arrays @gauze-like Ni(OH) <sub>2</sub>                                 | [1]      | 2680                                      | ---                                     | 6 A g <sup>-1</sup>                | 16%/150/10 A g <sup>-1</sup>                                                           | 2 M KOH     |
| SnO <sub>2</sub> nanowire arrays @Ni(OH) <sub>2</sub> ultrathin nanoflakes/Ni foam  | [2]      | 1553                                      | ---                                     | 0.5 A g <sup>-1</sup>              | ---                                                                                    | 6 M KOH     |
| Co <sub>3</sub> O <sub>4</sub> nanowires @Ni(OH) <sub>2</sub> /Ni foam              | [3]      | 1330                                      | 15.83                                   | 2.5 mA cm <sup>-2</sup>            | 100%/1000/25mA cm <sup>-2</sup>                                                        | 6 M KOH     |
| Fe <sub>2</sub> O <sub>3</sub> nanowires @Ni(OH) <sub>2</sub> nanosheet/Fe foil     | [4]      | 908                                       | 0.97                                    | 21.8 A g <sup>-1</sup>             | 85.7%/5000/54.6 A g <sup>-1</sup>                                                      | 1 M NaOH    |
| ZnO nanowires/Ni(OH) <sub>2</sub> /textile fiber                                    | [5]      | 3150                                      | ---                                     | 5 mV s <sup>-1</sup>               | 98%/5000/20mV s <sup>-1</sup>                                                          | 1 M LiOH    |
| Ni <sub>3</sub> S <sub>2</sub> nanorod@Ni(OH) <sub>2</sub> nanosheet/graphene       | [6]      | 1037                                      | ---                                     | 5.1 A g <sup>-1</sup>              | 99.1%/2000/5.9 A g <sup>-1</sup>                                                       | 3 M KOH     |
| NiCo <sub>2</sub> S <sub>4</sub> @Ni(OH) <sub>2</sub> nanotube arrays/carbon-fabric | [7]      | 2700                                      | ---                                     | <sup>d</sup> 1.3 A g <sup>-1</sup> | 78%/2000/5.9 A g <sup>-1</sup>                                                         | 1 M KOH     |
| NiMoO <sub>4</sub> @Ni(OH) <sub>2</sub> nanorods/Ni foams                           | [8]      | 4953                                      | 7.43                                    | <sup>d</sup> 2.7 A g <sup>-1</sup> | 72%/1000/16 A g <sup>-1</sup>                                                          | 2 M KOH     |
| ZnCo <sub>2</sub> O <sub>4</sub> @Ni(OH) <sub>2</sub> /Ni foam                      | [9]      | 2826                                      | ---                                     | 2 mA cm <sup>-2</sup>              | 72%/2000/10mA cm <sup>-2</sup>                                                         | 3 M KOH     |
| NiCo <sub>2</sub> O <sub>4</sub> @Ni(OH) <sub>2</sub> /carbon fiber                 | [10]     | 2475                                      | 6.04                                    | 5 mA cm <sup>-2</sup>              | 73.4%/1000/30mA cm <sup>-2</sup>                                                       | 2 M KOH     |

a: the specific capacitance and areal capacitance was obtained at the current density.

b: after cycling test, the retention of the specific capacitance.

c: the cycling test was carried out with the current density.

d: the value was calculated based on the data in the literature.

## References:

- [1] H. Yi, X. Chen, H. Wang, X. Wang, *Electrochim. Acta* 2014, 116, 372.
- [2] Qingqing Ke, C. Guan, M. Zheng, Y. Hu, K.-h. Ho, J. Wang, *Journal of Materials Chemistry A* 2015, 3, 9538.
- [3] C. H. Tang, X. Yin, H. Gong, *ACS Appl. Mater. Interfaces* 2013, 5, 10574.
- [4] W. Tian, X. Wang, C. Zhi, T. Zhai, D. Liu, C. Zhang, D. Golberg, Y. Bando, *Nano Energy* 2013, 2, 754.
- [5] I. Shakir, Z. Ali, J. Bae, J. Park, D. J. Kang, *RSC Advances* 2014, 4, 6324.
- [6] W. Zhou, X. Cao, Z. Zeng, W. Shi, Y. Zhu, Q. Yan, H. Liu, J. Wang, H. Zhang, *Energy Environ. Sci.* 2013, 6, 2216.
- [7] J. Zhang, H. Gao, M. Y. Zhang, Q. Yang, H. X. Chuo, *Appl. Surf. Sci.* 2015, 349, 870.
- [8] Ge Jiang, Mingyi Zhang, Xueqing Li, Hong Gao, *RSC Advances* 2015, 5, 69365.
- [9] H. X. Chuo, H. Gao, Q. Yang, N. Zhang, W. B. Bu, X. T. Zhang, *Journal of Materials Chemistry A* 2014, 2, 20462.
- [10] W. Li, L. Xin, X. Xu, Q. Liu, M. Zhang, S. Ding, M. Zhao, X. Lou, *Sci Rep* 2015, 5, 9277.
